# Supplementary material for: 40 years of actigraphy in sleep medicine and current state of the art algorithms
Source: PubMed Central journal article supplement (PMC10039037; doi:10.1038/s41746-023-00802-1), 2023-03-24
Supplement: 41746_2023_802_MOESM1_ESM.pdf [file 41746_2023_802_MOESM1_ESM.pdf]

## Supplementary Material

|                                       | ME     | RMSE  | Correlation | CI-95%+ | CI-95%- | CI-width |
|---------------------------------------|--------|-------|-------------|---------|---------|----------|
| <b>All Sleep or Wake</b>              | min    | min   |             | min     | min     | min      |
| All Sleep                             | 180.1  | 223.9 | na          | 443.1   | -83.0   | 526.1    |
| All Wake                              | -391.3 | 409.4 | 0.490       | -153.1  | -629.6  | 476.5    |
| <b>Raw Acceleration Algorithms</b>    |        |       |             |         |         |          |
| van Hees                              | 39.3   | 91.1  | 0.786       | 201.9   | -123.4  | 325.3    |
| Random Forest                         | 1.0    | 93.0  | 0.717       | 184.9   | -183.0  | 367.9    |
| <b>Deep Learning Count Algorithms</b> |        |       |             |         |         |          |
| CNN-50                                | 52.7   | 110.1 | 0.713       | 243.8   | -138.4  | 382.2    |
| CNN-20                                | 61.6   | 111.7 | 0.723       | 245.8   | -122.7  | 368.5    |
| CNN-100                               | 11.9   | 99.8  | 0.712       | 207.9   | -184.1  | 392.0    |
| LSTM-50                               | 0.7    | 91.6  | 0.743       | 181.9   | -180.5  | 362.4    |
| LSTM-100                              | 2.6    | 93.9  | 0.736       | 188.3   | -183.1  | 371.4    |
| LSTM-20                               | -10.6  | 86.4  | 0.766       | 159.1   | -180.3  | 339.4    |
| <b>Legacy Count Algorithms</b>        |        |       |             |         |         |          |
| Oakley                                | 59.8   | 107.7 | 0.748       | 236.9   | -117.3  | 354.2    |
| Oakley rsc                            | -10.4  | 81.7  | 0.795       | 149.9   | -170.7  | 320.6    |
| Sadeh                                 | 33.6   | 93.6  | 0.756       | 206.3   | -139.0  | 345.3    |
| Sadeh rsc                             | -88.3  | 133.2 | 0.693       | 108.9   | -285.6  | 394.5    |
| Cole-Kripke                           | 28.4   | 90.4  | 0.770       | 198.1   | -141.3  | 339.4    |
| Cole-Kripke rsc                       | -66.9  | 105.9 | 0.788       | 95.4    | -229.3  | 324.7    |
| Sazonov                               | -21.3  | 90.3  | 0.755       | 152.3   | -194.9  | 347.2    |
| Sazonov rsc                           | -143.7 | 169.3 | 0.739       | 33.5    | -320.8  | 354.4    |

**Supplementary Table 1** – Bland-Altman statistics for wake after sleep onset comparison between PSG and the various algorithms to predict it from wrist-based acceleration. ME – mean error, RMSE – root mean squared error CI – confidence interval and rsc – rescore.

|                                                | ME    | RMSE | Correlation | CI-95%+ | CI-95%- | CI-width |
|------------------------------------------------|-------|------|-------------|---------|---------|----------|
| <b>All Sleep or Wake</b>                       | %     | %    |             | %       | %       | %        |
| All Sleep                                      | -30.8 | 37.2 | na          | 10.8    | -72.3   | 83.1     |
| All Wake                                       | 69.2  | 72.4 | na          | 110.8   | 27.7    | 83.1     |
| <b>Raw Acceleration Algorithms</b>             |       |      |             |         |         |          |
| van Hees                                       | -5.7  | 13.0 | 0.839       | 17.4    | -28.8   | 46.2     |
| Random Forest                                  | 0.9   | 15.2 | 0.717       | 30.8    | -29.0   | 59.8     |
| <b>Deep Learning Activity Count Algorithms</b> |       |      |             |         |         |          |
| CNN-50                                         | -7.8  | 16.9 | 0.784       | 21.7    | -37.4   | 59.2     |
| CNN-20                                         | -9.5  | 16.7 | 0.797       | 17.6    | -36.6   | 54.2     |
| CNN-100                                        | -0.6  | 16.4 | 0.764       | 31.9    | -33.0   | 64.9     |
| LSTM-50                                        | 1.3   | 15.1 | 0.779       | 31.0    | -28.4   | 59.5     |
| LSTM-100                                       | 1.0   | 15.5 | 0.779       | 31.7    | -29.6   | 61.3     |
| LSTM-20                                        | 3.2   | 14.0 | 0.791       | 30.3    | -23.8   | 54.1     |
| <b>Legacy Activity Count Algorithms</b>        |       |      |             |         |         |          |
| Oakley                                         | -9.4  | 15.9 | 0.791       | 16.0    | -34.8   | 50.8     |
| Oakley rsc                                     | 2.8   | 12.7 | 0.827       | 27.3    | -21.6   | 48.9     |
| Sadeh                                          | -4.8  | 13.6 | 0.798       | 20.3    | -29.9   | 50.3     |
| Sadeh rsc                                      | 16.7  | 23.4 | 0.708       | 49.0    | -15.5   | 64.5     |
| Cole-Kripke                                    | -3.9  | 13.0 | 0.806       | 20.7    | -28.5   | 49.2     |
| Cole-Kripke rsc                                | 12.9  | 18.5 | 0.795       | 39.0    | -13.2   | 52.1     |
| Sazonov                                        | 4.8   | 14.5 | 0.762       | 31.9    | -22.2   | 54.1     |
| Sazonov rsc                                    | 26.3  | 30.5 | 0.689       | 57.1    | -4.6    | 61.6     |

**Supplementary Table 2** – Bland-Altman statistics for sleep efficiency comparison between PSG and the various algorithms to predict it from wrist-based acceleration. ME – mean error, RMSE – root mean squared error CI – confidence interval and rsc – rescore.

|                                                | <b>ME</b> | <b>RMSE</b> | <b>Correlation</b> | <b>CI-95%+</b> | <b>CI-95%-</b> | <b>CI-width</b> |
|------------------------------------------------|-----------|-------------|--------------------|----------------|----------------|-----------------|
| <b>All Sleep or Wake</b>                       | min       | min         |                    | min            | min            | min             |
| All Sleep                                      | -180.1    | 223.9       | 0.271              | 83.0           | -443.1         | 526.1           |
| All Wake                                       | 391.3     | 409.4       |                    | 629.6          | 153.1          | 476.5           |
| <b>Raw Acceleration Algorithms</b>             |           |             |                    |                |                |                 |
| van Hees                                       | -39.3     | 91.1        | 0.792              | 123.4          | -201.9         | 325.3           |
| Random Forest                                  | -1.0      | 93.0        | 0.719              | 183.0          | -184.9         | 367.9           |
| <b>Deep Learning Activity Count Algorithms</b> |           |             |                    |                |                |                 |
| CNN-50                                         | -52.7     | 110.1       | 0.777              | 138.4          | -243.8         | 382.2           |
| CNN-20                                         | -61.6     | 111.7       | 0.768              | 122.7          | -245.8         | 368.5           |
| CNN-100                                        | -11.9     | 99.8        | 0.777              | 184.1          | -207.9         | 392.0           |
| LSTM-50                                        | -0.7      | 91.6        | 0.788              | 180.5          | -181.9         | 362.4           |
| LSTM-100                                       | -2.6      | 93.9        | 0.791              | 183.1          | -188.3         | 371.4           |
| LSTM-20                                        | 10.6      | 86.4        | 0.787              | 180.3          | -159.1         | 339.4           |
| <b>Legacy Activity Count Algorithms</b>        |           |             |                    |                |                |                 |
| Oakley                                         | -59.8     | 107.7       | 0.721              | 117.3          | -236.9         | 354.2           |
| Oakley rsc                                     | 10.4      | 81.7        | 0.796              | 170.7          | -149.9         | 320.6           |
| Sadeh                                          | -33.6     | 93.6        | 0.746              | 139.0          | -206.3         | 345.3           |
| Sadeh rsc                                      | 88.3      | 133.2       | 0.699              | 285.6          | -108.9         | 394.5           |
| Cole-Kripke                                    | -28.4     | 90.4        | 0.746              | 141.3          | -198.1         | 339.4           |
| Cole-Kripke rsc                                | 66.9      | 105.9       | 0.778              | 229.3          | -95.4          | 324.7           |
| Sazonov                                        | 21.3      | 90.3        | 0.724              | 194.9          | -152.3         | 347.2           |
| Sazonov rsc                                    | 143.7     | 169.3       | 0.693              | 320.8          | -33.5          | 354.4           |

**Supplementary Table 3** – Bland-Altman statistics for total sleep time (TST) comparison between PSG and the various algorithms to predict it from wrist-based acceleration. ME – mean error, RMSE – root mean squared error CI – confidence interval and rsc – rescore.

| <b>Paper</b> | <b>Model</b>           | <b>Dataset</b> | <b>n</b> | <b>Sensitivity</b> | <b>Specificity</b> | <b>Accuracy</b> |
|--------------|------------------------|----------------|----------|--------------------|--------------------|-----------------|
| [16]         | Sadeh                  | Sadeh          | 26       | 96.0               | 75.2               | 91.9            |
| [8]          | Cole-Kripke            | Cole-Kripke    | 21       | 96.1               | 60.0               | 87.9            |
| [8]          | Cole-Kripke<br>rescore | Cole-Kripke    | 21       | 95.2               | 64.5               | 88.3            |
| [14]         | van Hees               | Newcastle      | 28       | 91                 | 45                 | 83              |
| [15]         | Sundararajan           | Newcastle      | 24       | 89.7               | 58.9               | nr              |
| [13]         | Sadeh                  | MESA           | 363      | 98.3               | 38.3               | 73.4            |
| [13]         | Sadeh rescore          | MESA           | 363      | 92.8               | 59.4               | 79.1            |
| [13]         | Cole-Kripke            | MESA           | 363      | 96.7               | 45.0               | 75.4            |
| [13]         | Cole-Kripke<br>rescore | MESA           | 363      | 89.9               | 65.7               | 80.2            |
| [13]         | Oakley                 | MESA           | 363      | 96.9               | 41.2               | 73.9            |
| [13]         | Oakley rescore         | MESA           | 363      | 92.8               | 59.8               | 79.3            |
| [13]         | LSTM-100               | MESA           | 363      | 91.4               | 69.9               | 83.1            |
| [13]         | CNN-100                | MESA           | 363      | 91.7               | 68.8               | 82.9            |
| [13]         | LSTM-50                | MESA           | 363      | 90.5               | 70.1               | 82.7            |
| [13]         | CNN-50                 | MESA           | 363      | 92.0               | 67.6               | 82.5            |
| [13]         | CNN-20                 | MESA           | 363      | 90.9               | 66.5               | 81.4            |
| [13]         | LSTM-20                | MESA           | 363      | 92.0               | 65.0               | 81.3            |

**Supplementary Table 4** – Summary of validation statistics from the previous studies presenting algorithms to predict sleep-wake from wrist acceleration. Nr – not reported.
